# Supplementary material for: β-Amyrin biosynthesis: catalytic mechanism and substrate recognition
Source: Royal Society of Chemistry journal article supplement (doi:10.1039/c7ob00238f), 2017-01-01

EtAS W257,

EtAS Y259

S2

EtAS : CMRLLGEGPNG-GQDNACSRARKWIIDHGGATYIPSWGKTWLSILGVYEWISGNSNMPPEFWILP TFLPMHPAKM WYCRMVYMPMSYLYGKRFVGPITPL : 282  
 PNY1 : CMRILGEGPDG-GVNNACARGRKWILDHGSVTAIPSWGKTWLSILGVYEWIGSNMPPEFWILP SFLPMHPAKM WYCRMVYMPMSYLYGKRFVGPITPL : 284  
 BPY : CMRILGEGPDG-GQDNACARARKWILDHGGVTHMPSWGKTWLSILGIFEWIGSNMPPEFWILP SFLPMHPAKM WYCRMVYMPMSYLYGKRFVGPITPL : 282  
 PSY : CMRILGEGPDG-GEDNACVRARNWIRQHGGSVTHIPSWGKTWLSILGVEDWLGSNMPPEFWILP SFLPMHPAKM WYCRMVYMPMSYLYGKRFVGPITPL : 282  
 AtLUP1 : CLRMLGENP----EQDACKRARQWILDRGGVIFIPSWGKFWLSILGVYDWSGTNPTPELLMLP SFLPIHHPGKILYCRMVYMPMSYLYGKRFVGPITPL : 280  
 TRW : TLRLLGEEADSVAEADMALVGRKWILDHGGAVGIPSWGKFWLTIILGVYEWGGCNMPPEFWLMBKFFPIHHPGKMLYCRMVYMPMSYLYGKRFVGPITEL : 283  
 OEW : TLRLLGEGQED-GEDKAVARGRKWILDHGGAVGIPSWGKFWLTVLGVYEWGDCNMPPEFWLLENFSPHHPGKMLYCRMVYMPMSYLYGKRFVGPITGL : 281  
 BPW : ALRILGEGLED-GEDGAMAKSRKWILDHGGGLVAIPSWGKFWVTVLGVYEWSGCNPLPPEFWFLDIFPIHHPGKMLYCRMVYMPMSYLYGKRFVGPITGL : 280  
 AtCAS1 : TLRLLGEGPNDG--DGDMEKGRDWILNHGCATNITSWGKMWLSVLCAYEWSGNNPLPPEIWLLEPYLPIHHPGRMWHCRMVYLPMSYLYGKRFVGPITST : 280  
 PsCAS : TLRLLGEGPNDG--EGDMEKGRDWILEHGGATYITSWGKMWLSVLCAYEWSGNNPLPPEIWLLEPYLPIHHPGRMWHCRMVYLPMSYLYGKRFVGPITPT : 280  
 PgCAS : TLRLLGEGANDG--QGAMKGRQWILDHGSATAITSWGKMWLSVLCAYEWSGNNPLPPEIWLLEPYLPIHHPGRMWHCRMVYLPMSYLYGKRFVGPITPT : 280  
 BpCAS1 : TLRLLGE-PEDG--MGAVEKARKWILDHGGATAITSWGKMWLSVLCAYEWSGNNPLPPEIWLLEPYLPIHHPGRMWHCRMVYLPMSYLYGKRFVGPITST : 290  
 AtLAS1 : ALRLMGEELDGG--DGAMESARSWIHGGATFIIPSWGKFWLSVLCAYEWSGNNPLPPELWLLPYSLPFHPGRMWHCRMVYLPMSYLYGKRFVGPITNGT : 280  
 HsLAS : SLRILGVGPD----DPDLVRARNILHKKGGAVAIIPSWGKFWLAVLNIVYSWEGNLTLFPEMWFPEWVAHPSTIWHCRMVYLPMSYLYGKRFVGPITSAEDPL : 255  
 MmLAS : ALRILGIGPD----DPDLVRARNVILHKKGGAVAIIPSWGKFWLAVLNIVYSWEGNLTLFPEMWFPEWVAHPSTIWHCRMVYLPMSYLYGKRFVGPITSAEDPL : 256  
 ScLAS : ILRLGLPKD----HPVCAKARSTLLRLGCAIGSPHWKILWLSALNIYKWEVNEAPPETWLLPYSLPMHPGRMWHCRMVYLPMSYLYGKRFVGPITSAEDPL : 257  
 SHC : ALKYIGMSRD----EEPQKALRFIQSQGGIESSRVETRMWLAIVGEYPMWEKVPMPPEIMFLGKRMPLNIYEBGWARATVVALSIIVMSRQ---PVFPL : 189  
 64 6G r 6 Gg s5g4 W6 6g 5 W g np pPE w l f

Erg 7 W232

PNY1 Y261, Erg. H234

EtAS : ILQLR-QELHTQPYHHINWTKTRHLCAHEDVYYPHPLIQDLWDSLYIFTEPLLTRWPFNKIIRKKALEVTMKHIHYEDENSRYITIGCVER--VLCMLA : 379  
 PNY1 : ILQLR-EELYGQPYNEINWTKTRRVCAGEDIYYPHPLIQDLLWDSLYVLTPELLTRWPFNKI-REKALQTTMKHIHYEDENSRYITIGCVER--VLCMLV : 380  
 BPY : ILQLR-EELYTQPYHQVNWKKVRHLCAKEDIYYPHPLIQDLLWDSLYIFTEPLLTRWPFNKIIVREKALQVTMKHIHYEDENSRYITIGCVER--VLCMLA : 379  
 PSY : ILQLR-EELHTEPYEKNWTKTRHLCAKEDIYYPHPLIQDLIWDLSLYIFTEPLLTRWPFNKIIVREKALQVTMKHIHYEDENSRYITIGCVER--VLCMLA : 379  
 AtLUP1 : ILLLR-EELYLEPYEEINWKKSRRLYAKEDMYYAHPVQDLLSDTLQNFVEPLLTRWPLNKLIVREKALQVTMKHIHYEDENSHYITIGCVER--VLCMLA : 377  
 TRW : VRDLR-QELYTDPYDEINWTKARNTCAKEDLYYPHPLVQDMVWGVLDHNVVEPVLTSRPISTL-REKALKVAMDVHYEDKSSRYLCIGCVER--VLCMLA : 379  
 OEW : VLSLR-QEITYTEPYHGINWTKARNTCAKEDLYYPHPLAQMMLWGLDHHFAEPVLTTRWPFSKL-REKALKVAMDVHYEDMNSRYLCIGCVER--VLCMLA : 377  
 BPW : IQSLR-QELYNEPYHQINWTKARNTVAKEDLYYPHPLIQDLLWGLDHHVAEPVLTTRWPF SML-REKALKAAIGVHYEDENSKYLCIGSVER--VLCMLA : 376  
 AtCAS1 : VLSLR-KELETVPYHEVNWNEARNLCAKEDLYYPHPLVQDILWASLHKIVEPVLMRWPGANL-REKAIKTAIEHIHYEDENTRYICIGPVNK--VLNMLC : 376  
 PsCAS : VLSLR-KELETVPYHDIWQARNLCAKEDLYYPHPLVQDILWATLHKFVEPVFMNWPGKKL-REKAIKTAIEHIHYEDENTRYICIGPVNK--VLNMLC : 376  
 PgCAS : VLSLR-KEVESVPYHEIDWQARNLCAKEDLYYPHPLIQDILWASLKVWVEPIFMHWPAKKL-REKSLRTVMEHIHYEDENTRYICIGPVNK--VLNMLC : 376  
 BpCAS1 : IQSLR-KELYTVPYHEIDWTKARNDCAKEDLYYPHPLVQDILWASLYYAYEPIFMYWPAKRL-REKALDTVMQHIHYEDENTRYICIGPVNK--VLNMLC : 386  
 AtLAS1 : ILSLR-RELYTIPYHHIDWDTARNQCAKEDLYYPHPKTIQDVLWSDLNKFGEPLLERWPLNLL-RNHALQTVMQHIHYEDENTRYICIGPVNK--VLNMLC : 376  
 HsLAS : VQSLR-QELYVEDEASIDWLAQRNNVAPDELYYTPHPSWLLRVVYALLN----LYEHHHSAHL-RQAVQKLYBHVADDRFTKISIGPISK--TINMLV : 346  
 MmLAS : VQSLR-QELYVQDYASIDWPAQRNNVSPDEMYTTPHPSWLLRVVYALLN----LYERFHTSL-RKAVQMLYBHVAAADDCTKISIGPISK--TINMLV : 347  
 ScLAS : LEELR-NEIYTKPFDKINWTKARNTVCGVDLYYPHSTTLNIA-NSLVVIFYEKYLRNRFIYSLSKKRVYDL----IKTELQNTDSLCLABVWQ--AFCALV : 349  
 SHC : PERARVPELYETDV-----PPRRRGAKGG----GGWIFDALDRALHGYQK--LSVHPFRRAAEIRALDWLLERQAGD-----SWGGIQPPWFYALIA : 271  
 lR E6 p R a d yph L e p a h e d i g 6 k 6

## EtAS F413

## EtAS F474

EtAS : CW-AEDPNGVPEKKHLARI PDYMWVAEDGMKMQSF-GSQQWDTGFAIQALLASNLTE--EIGQVLKKGHDFFIKKSQVKENP-SGDFKSMHRHISKGSWTF : 474  
 PNY1 : CW-VEDPNGDYERKHLARI PDYIWWVAEDGMKMQSF-GSQEWDGTGFSIQALLSDSLTH--EIGPTLMKKGHDFFIKKSQVKDNP-SGDFKSMYRHHISKGSWTF : 475  
 BPY : CW-VEDPNGDYEEKHIARI PDYIWWVAEDGIKMQSF-GSQEWDGTGFAIQALLASNLTD--EIGPTLARGHDFFIKKSQVKDNP-SGDFESMHRHISKGSWTF : 474  
 PSY : CW-VEDPNGDAEKKHIARV PDYLWVISEDGMTMQSF-GSQEWDAGFAVQALLATNLIE--EIKPALARGHDFFIKKSQVTENP-SGDFKSMHRHISKGSWTF : 474  
 AtLUP1 : CW-VBNPNGDYEEKHLARI PDYMWVAEDGMKMQSF-GCQLWDTGFAIQALLASNLDP--ETDDALKRGHNYIKASQVRENK-SGDFRSMYRHHISKGSWTF : 472  
 TRW : TW-VEDPNGDAYKRHLARI PDYFVVAEDGMKMQSF-GCQMWDAFAIQATFSSNLTE--EYGPTLKKAHAEFVKASQVRDNP-PGDFSKMYRHTSKGSWTF : 474  
 OEW : CW-VEDPNSEAYKRHIARI PDYFVVAEDGLKMQSF-GCQMWDAFAIQAILSSNLAE--EYGPTLMKAHAEFVKASQVQENP-SGDFNEMYRHTSKGSWTF : 472  
 BPW : CW-AEDPNGEAYKHLGRIPDNYWVAEDGLKIQSF-GCQMWDAFAIQAILSCNLNE--EYWPTLRKAHAEFVKASQVPENP-SGDFKAMYRHINKGSWTF : 471  
 AtCAS1 : CW-VEDPNSEAEKHLHPRIHDFLWVAEDGMKMQCYNGSQLWDTGFAIQAILATNLVE--EYGPVLEKAHAEFVKNSQVLEDC-PGDLNYWYRHHISKGSWTF : 472  
 PsCAS : CW-VEDPNSEAEKHLHPRIYDYLWVAEDGMKMQCYNGSQLWDTAFAAQAIISTNLID--EFGPTLKRKAHAFIKNSQVSEDC-PGDLNYSKWRHHISKGSWTF : 472  
 PgCAS : CW-VEDPNSEAEKHLHPRLHDFLWVAEDGMKMQCYNGSQLWDTAFAVQAIISTNLAE--EYGPTLRKAHAFMKNNSQVLDCC-PGDLDAWYRHHISKGSWTF : 472  
 BpCAS1 : CW-AEDPNSEAEKHLHPRIILDYLVVAEDGMKMQCYNGSQLWDTTFAVQAIISTNIAE--EYQTLRKAHEYIKDSQVLEDC-PGDLNFWYRHHISKGSWTF : 482  
 AtLAS1 : CW-VESNSEAEKSHLSRIKDYLVVAEDGMKMQCYNGSQLWDTLAVQAILATNLVD--DYGLMLKKAHNYIKNTQIRKDT-SGDPGLWYRHHISKGSWTF : 472  
 HsLAS : RMYVDGPASTAEQEHVSRI PDYLWVGLDGMKMQCTNGSQIWDTAFAIQALLEAGGHRPEFSSCLQKAHEFLRLSQVDPNP-P-DYQKYRQMRKGGGSE : 444  
 MmLAS : RWSVDGPPSSPAEQEHVSRIKDYLVWGLDGMKMQCTNGSQIWDTSFAIQALLEAGAHHRPEFLPCLQKAHEFLRLSQVPENC-P-DYQKYRHRMRKGGGSE : 445  
 ScLAS : TLIEGVDSEAEQRLQYRFKDALFHGPOGMITMGTNGVQTDWCAFAIQYEFVAGLAERPEFYNTIIVSAYKELCHAQEDTECVPGS----YRDKRKGGGSE : 445  
 SHC : LKILDMTQHPAEIKGWEGLELVGVELDYGGWVFCASISPVNDTGLAVLALRAAGLPADHD---RLVRAGEMILLDROIT---VPGDWAVKRPNLKGGEFAE : 365

w e b 5 h r d g q WD fa qa e 6 h 56 Q -- -h kG 5 F

## EtAS V483

D<sup>485</sup>CTAE

## Erg 7 T384

## EtAS W534

## EtAS E563

## EtAS C564

## Erg 7 F445

EtAS : SDQDHGWCVSDCTAEGKCCLLFSMPP-EIVGKMDAQHLYNAVNIILISLQS----KNGGLAAMEPAGAQQWLEMLNPTFEFFADIVIEHEYVECTASAI : 569  
 PNY1 : SDQDHGWCVSDCTAEGKCCLLFSMPPE-EIVGKKIKPERLYDSVNVLLSLQS----KNGGLSAMEPAGAQEWLEMLNPTFEFFADIVIEHEYVECTSSAI : 570  
 BPY : SDQDHGWCVSDCTAEGKCCLLFSIMPP-EIVGKMEPEQLYDSVNVLLSLQS----KNGGLAAMEPAGAQEWLEMLNSTEFAADIVIEHEYVECTASAM : 569  
 PSY : SDQDHGWCVSDCTAEGKCCLLLSLPP-EIVGKMEPERLFDVNVLLSLQS----KNGGLAAMEPAGAQEWLEMLNPTFEFFADIVVEHEYVECTGSAI : 569  
 AtLUP1 : SDRDHGWCVSDCTAEGKCCLLLSMMSA-DIVGQKIDDEQLYDSVNVLLSLQS----GNGGVNAMEPSPRAYKWLEMLNPTFEFFADIVVEHEYVECTSSVI : 567  
 TRW : SIQDHGWCVSDCTAEGKVSLLYSQMPN-KLVGKQVETEHLYDAVNVILSLQS----ENGGFPAMEPQRAYAWLEMLNPTFEFFEDVLIERYVECTSSAI : 569  
 OEW : SMQDHGWCVSDCTAEGKVAALLFSQMPI-ELVGAETETGHLYDAVNVILSLQS----ASGGFPAMEPQKAYRWLEMLNPTFEFFEDVLIERYVECTSSAV : 567  
 BPW : SMQDHGWCVSDCTAEGKVAALLFSQMPN-DLVGKIEKERLYDAVNVILSLQS----SNGGFPAMEPQRAYGWLEMLNPTFEFFEDVLIERYVECTSPAV : 566  
 AtCAS1 : STADHGWEI SDCTAEGKVAALLSKVPK-AIVGEPIDAKRLYEAVNVIIISLQN----ADGGLATYELTRSYPWLEMLNPAETEGDIVIDYPPVECTSAAI : 567  
 PsCAS : STADHGWEI SDCTAEGKVAALLSKVAP-EIVGEPIDSKRLYEAVNVIIISLQN----ENGGLATYELTRSYTWLEMLNPAETEGDIVIDYPPVECTSAAI : 567  
 PgCAS : STADHGWEI SDCTAEGKVAALLSKVPS-ELVGEPLDAKRLYEAVNVIIISLQN----SDGGYATYELTRSYSWLEMLNPAETEGDIVIDYPPVECTSAAI : 567  
 BpCAS1 : STADHGWEI SDCTAEGKVAALLSQFPS-ETVGSVDVVRLYDAVNVILSLQN----TDGGFATYELTRSYHWLEMLNPAETEGDIVIDYPPVECTSAAI : 577  
 AtLAS1 : STGDNFWEI SDCTAEGKVAALLSQMPV-NLVGEPMPPEHLVDAVNEIISLQN----KNGGFASYELTRSYPELEVINPSETEGDIIIDYQYVECTSAAI : 567  
 HsLAS : STLDCGWIIVSDCTAEGKVAALLLQEKCP-HVT-EHPRERLCDAVAVLLNMRN----PDGGFATYETKRGHLEMLNPNSEVEGDIMIDYTYVECTSAVI : 538  
 MmLAS : STLDCGWIIVSDCTAEGKVAALLLQNCQP-SIT-EHPRERLCDAVDVLLSLRN----ADGGFATYETKRGHLEMLNPNSEVEGDIMIDYTYVECTSAVI : 539  
 ScLAS : STKTQYTVADCTAEAIKAIIMVKNSPVFSEVHHMISSEERLEFEGIDVLLNIGNISGFYEGSFATYEKIKAPLAMETLNPAEVEGDIMVEYPPVECTDSSV : 545  
 SHC : QFDNVVYIPDVEDTA-----VWVWALNLTLPDERRRRDAMTKGFRWLVGMQS----SNGGWGAYDNDNTSDLPNHI-PFCDEGEVT-DPPSEIVTAHVIL : 453

sDcTAE k 6 v 6 66 6q Ga 5e e np e f

## Erg 7. V454

## DXDD for SHC

## Erg 7 Y510

## Erg 7 E539

## Erg 7 C540

```

*           420           *           440           *           460           *           480           *           500
EtAS   : CM-AEDPNGVPEKKHLARI PDYMWVAEDGMKMQSF-GSQQWDTGFAIQALLASNLTE--EIGQVLKKGHDFIKKSQVKENP-SGDFKSMHRHISKGSWTF : 474
PNY1   : CM-VEDPNGDYERKHLARI PDYIWWVAEDGMKMQSF-GSQEWDGTGFSIQALLSDSLTH--EIGPTLMKGHDFIKKSQVKDNP-SGDFKSMYRHHISKGSWTF : 475
BPY    : CM-VEDPNGDYEEKHIARI PDYIWWVAEDGIKMQSF-GSQEWDGTGFAIQALLASNLTD--EIGPTLARGHDFIKKSQVKDNP-SGDFESMHRHISKGSWTF : 474
PSY    : CM-VEDPNGDAEKKHIARV PDYLWISEDGMTMQSF-GSQEWDAGFAVQALLATNLTIE--EIKPALARGHDFIKKSQVTENP-SGDFKSMHRHISKGSWTF : 474
AtLUP1 : CM-VBNPNGDYEEKHLARI PDYMWVAEDGMKMQSF-GCQLWDTGFAIQALLASNLPD--ETDDALKRGHNYIKASQVRENP-SGDFRSMYRHHISKGAWTF : 472
TRW    : TW-VEDPNGDAYKRHLARI PDYFWVAEDGMKMQSF-GCOMWDAFAIQATFSSNLTE--EYGPTLKKAHAEFVKASQVRDNP-PGDFSKMYRHTSKGAWTF : 474
OEW    : CM-VEDPNSEAYKRHIARI PDYFWVAEDGLKMQSF-GCOMWDAFAIQAILSSNLAE--EYGPTLMKAHAEFVKASQVQENP-SGDFNEMYRHTSKGAWTF : 472
BPW    : CM-AEDPNGEAYKHLGRIPDNYWVAEDGLKIQSF-GCOMWDAFAIQAILSCNINE--EYWPTLRKAHAEFVKASQVPENP-SGDFKAMYRHHINKGAWTF : 471
AtCAS1 : CM-VEDPNSEAEKHLHPRIHDFLWLAEDGMKMQGYNGSQLWDTGFAIQAILATNLVE--EYGPVLEKAHAEFVKNSQVLEDC-PGDLNYWYRHHISKGAWPF : 472
PsCAS  : CM-VEDPNSEAEKHLHPRIYDYLWVAEDGMKMQGYNGSQLWDTAFAAQAIISTNLID--EFGPTLKRKAHAFIKNSQVSEDC-PGDLKQYRHHISKGAWPF : 472
PgCAS  : CM-VEDPNSEAEKHLHPRLHDFLWLAEDGMKMQGYNGSQLWDTAFAVQAIISTNLAE--EYGPTLRKAHAFMKNSQVLDLDC-PGDLDAWYRHHISKGAWPF : 472
BpCAS1 : CM-AEDPNSEAEKHLHPRIILDYLVIAEDGMKMQGYNGSQLWDTTFAVQAIISTNIAE--EYQTLRKAHEYIKDSQVLEDC-PGDLNFYRHHISKGAWPF : 482
AtLAS1 : CM-VESNSEAEKSHLSRIKDYLVVAEDGMKMQGYNGSQLWDTLAVQAILATNLVD--DYGLMLKKAHNYIKNTQIRKDT-SGDPGLWYRHHISKGAWPF : 472
HsLAS  : RMYVDGPASTAEQEHVSRI PDYLWMLGLGMKMQGTNGSQIWDTAFAIQALLEAGGHRPEFSSCLQKAHEFLRLSQVDPNP-P-DYQKYRQMRKGGFSEF : 444
MmLAS  : RWSVDGPPSSPAEQEHVSRIKDYLVWGLGLGMKMQGTNGSQIWDTSFAIQALLEAGAHHRPEFLPCLQKAHEFLRLSQVPENC-P-DYQKYRHRMRKGGFSEF : 445
ScLAS  : TLIEGVDSEAEQRLQYRFKDALFHGPOGMITMGTVGVTWDCAFAIQYFFVAGLAERPEFYNTIIVSAYKELCHAQEDTECVPGS----YRDKRKGAWGF : 445
SHC    : LKILDMTQHPAEIKGWEGLELVGVELDYGGWVFQASISPVNDTGLAVLALRAAGLPADHD---RLVRAGEMILLDROIT---VPGDWAVKRPNLKEGGFAF : 365
w e p 5 h r d dG k6q g q WD fa qa e 6 h 56 Q gd rh kG 5 F

```

```

*           520           *           540           *           560           *           580           *           600
EtAS   : SDQDHGWQVSDCTAEGLKCLLFSMMPPEIVGKEMDAQHLYNAVNIILISLQS----KNGGLAAMEPAGAQQWLEMLNPTFEFFADIVIEHEHYVECTASAI : 569
PNY1   : SDQDHGWQVSDCTAEGLKCLLFSMMPPEIVGKKIKPERLYDSVNVLLSLQS----KNGGLSAMEPAGAQEWLEMLNPTFEFFADIVIEHEHYVECTSSAI : 570
BPY    : SDQDHGWQVSDCTAEGLKCLLFSIMPP-EIVGKEMPEQLYDSVNVLLSLQS----KNGGLAAMEPAGAQEWLEMLNPTFEFFADIVIEHEHYVECTASAM : 569
PSY    : SDQDHGWQVSDCTAEGLKCLLFSLLPP-EIVGKEMPERLFDVNVLLSLQS----KNGGLAAMEPAGAQEWLEMLNPTFEFFADIVIEHEHYVECTGSAM : 569
AtLUP1 : SDRDHGWQVSDCTAEGALKCLLFSMMSA-DIVGQKIDDEQLYDSVNVLLSLQS----GNGGVNAMEPSRAYKWLEMLNPTFEFFADIVIEHEHYVECTSSVI : 567
TRW    : SIQDHGWQVSDCTAEGLKVSLLYSQMNP-KLVGKIVETEHLVDVNVVILSLQS----ENGGFPAMEPQRAYAWLEMLNPTFEFFADIVIEREYVECTSSAI : 569
OEW    : SMQDHGWQVSDCTAEGLKAAALLFSQMPI-ELVGAETETGHLYDAVNVVILSLQS----ASGGFPAMEPQKAYRWLEMLNPTFEFFADIVIERDYVECTSSAV : 567
BPW    : SMQDHGWQVSDCTAEGLKVAALLFSQMPPEIVGKIEKERLYDAVNVVILSLQS----SNGGFPAMEPQRAYAWLEMLNPTFEFFADIVIEREYVECTSPAV : 566
AtCAS1 : STADHGWPI SDCTAEGLKAAALLSKVPK-AIVGEPIDAKRLYEAVNVIIISLQN----ADGGLATYELTRSYPWLEMLNPTFEFFADIVIEHEHYVECTSAAI : 567
PsCAS  : STADHGWPI SDCTAEGLKAVLLLSKIAP-EIVGEPIDSKRLYDAVNVVILSLQN----ENGGLATYELTRSYTWLEMLNPTFEFFADIVIEHEHYVECTSAAI : 567
PgCAS  : STADHGWPI SDCTAEGFKAVLQLSKLPS-ELVGEPLDAKRLYDAVNVVILSLQN----SDGGYATYELTRSYSWLEMLNPTFEFFADIVIEHEHYVECTSAAI : 567
BpCAS1 : STADHGWPI SDCTAEGLKAVLLLSQFPS-ETVGKSVVVKRLYDAVNVVILSLQN----TDGGFATYELTRSYHWLEMLNPTFEFFADIVIEHEHYVECTSAAI : 577
AtLAS1 : STGDNFMPVSDCTAEGALKAAALLSQMPV-NLVGEPMPPEHLVDVNVVILSLQN----KNGGFASYELTRSYPELEVINPSETEGDIIIDYQYVECTSAAI : 567
HsLAS  : STLDCEMIVSDCTAEGALKAVLLLQEKCP-HVT-EHIPRERLCDAVAVLLNMRN----PDGGFATYETKRGHLEMLNPTFEFFADIVIEHEHYVECTSAAM : 538
MmLAS  : STLDCEMIVADCTAEGALKAVLLLQNCQP-SIT-EHIPRERLCDAVDVLLSLRN----ADGGFATYETKRGHLEMLNPTFEFFADIVIEHEHYVECTSAAM : 539
ScLAS  : STKTQYTVADCTAEAIKAIIMVKNSPVFSEVHHMISSERLFEIGIDVLLNLRNIGSFYEGSFATYETKIKAPLAMETLNPAEVEFGDIMVEYVECTDSSV : 545
SHC    : QFDNVIYVDPVDDTA-----VWVWALNLTLPDERRRRRDAMTKGFRWLVGMQS----SNGGFGAYDVDNTSDLPNHIFPFCDEGEVTDPPSEDVTAHV : 453
s g5 sDcTAE k 6 v 6 66 6q Gg 5e e n p e f e c t 6

```



EtAS W612

|        |   |             |               |             |               |                  |               |            |              |             |           |           |           |   |
|--------|---|-------------|---------------|-------------|---------------|------------------|---------------|------------|--------------|-------------|-----------|-----------|-----------|---|
|        |   | *           | 620           | *           | 640           | 660              | *             | 680        | *            | 700         |           |           |           |   |
| EtAS   | : | HALIMFKKLY  | PGHRKKEIENFI  | TNAVKYLEDVQ | TADGGMYGNW    | GVCFITYGTWFAVGG  | LAAAGKNYNN    | ---        | CAAMRRAVDFL  | IRTKQKQDGGW | GESYLSCP  |           |           |   |
| PNY1   | : | QALVLEKFKLY | PGHRKKEIDNEFI | TNAVRYLEDT  | QMPDGSWYGNW   | GVCFITYGSWFALGG  | LAAAGKTYYN    | ---        | CAAVRRAVEFLL | KSQMDDGGW   | GESYLSCP  |           |           |   |
| BPY    | : | OTLVLEKFKLY | PGHRKKEIENFI  | KNAAQFLQVI  | QMPDGSWYGNW   | GVCFITYGTWFAVGG  | LAAVGGKTYNN   | ---        | CLAVRRAVDFL  | LRAQRDNGG   | WGESYLSCP |           |           |   |
| PSY    | : | QALVLEKFKLY | PGHRKKEIENFI  | ENAVRELEDT  | QTEDGSWYGNW   | GVCFITYGSWFALGG  | LAAAGKTYTN    | ---        | CAAIRRGVKFLL | TTQOREDDGG  | WGESYLSS  |           |           |   |
| AtLUP1 | : | QALDLEKFKLY | PDHRKKEINRSI  | EKAVQFIQDN  | QTPDGSWYGNW   | GVCFITYATWFAVGG  | LAAAGETYN     | ---        | CLAMRNGVHFLL | TTQRDDGGW   | GESYLSCSE |           |           |   |
| TRW    | : | OGLTLEKFKLY | PGHRTKEIEHCI  | SRAVKYVEDT  | QESDGSWYGNW   | GVCFITYGTWFAVDAL | VACGKNYHN     | ---        | CPALQKACKFLL | SKQLPDGGW   | GESYLSSSN |           |           |   |
| OEW    | : | QALKLEKQLHP | PGHRRKEIASCI  | SKAIQYIEAT  | QNPDGSWYGNW   | GVCFITYGTWFAVGG  | LAAAGKTYNN    | ---        | SPTLRRACEFLL | SKQLPDGGW   | GESYLSSSN |           |           |   |
| BPW    | : | HGLALEKFKLY | PGHRTKEIEHCI  | SRAVKYVEDT  | QESDGSWYGNW   | GVCFITYGTWFAVGG  | LAAAGKTYNN    | ---        | SPTLRRACEFLL | SKQLPDGGW   | GESYLSSSN |           |           |   |
| AtCAS1 | : | QALISERKLY  | PGHRKKEVDECI  | EKAVKFIESI  | QAADGSWYGNW   | GVCFITYGTWFGV    | KGLVAVGKTL    | ---        | SPHVARACEFLL | SKQPPSGGW   | GESYLSCQD |           |           |   |
| PcCAS  | : | QALATEFKLY  | PGHREIEIQCCI  | EKAVAFIEKI  | QASDGSWYGNW   | GVCFITYGTWFGI    | KGLIAAGKNE    | ---        | CLSIKFACEFLL | SKQLPSGGW   | AESEYLSCQ |           |           |   |
| PgCAS  | : | QALTAEFKLY  | PGHREIEIQHSI  | EKAALFIEKI  | QSSDGSWYGNW   | GVCFITYGTWFGI    | KGLVAVGKTL    | ---        | CASIKFACEFLL | SKQVAVGGW   | GESYLSCQ  |           |           |   |
| BpCAS1 | : | QALTFEKKLY  | PGHREIEIENCI  | AKAAEFIENI  | QASDGSWYGNW   | GVCFITYGTWFGI    | KGLVAVGKTL    | ---        | CSSIHFACEFLL | SKELASGGW   | GESYLSCQ  |           |           |   |
| AtLAS1 | : | OGLVLEF     | TTLNNSYKRKEI  | VGSIKAVEFIE | KTQLPDGSWYGNW | GVCFITYATWFGI    | KGLVAVGKTL    | ---        | SLCIRKACG    | FLLSKQLCCGG | WGESYLSCQ |           |           |   |
| HsLAS  | : | QALKYFHKRF  | FEHRAAEIRET   | LQGLEFCRR   | QQRADGSWEGS   | WGVCFITYGTWFG    | LEAFACMGQ     | TYRDTG     | TACA         | EVSRACDFLL  | SRQADGGW  | GEDFESCEE |           |   |
| MmLAS  | : | QALKHEHEHF  | FDYRAAEVRET   | LNQGLDFCRR  | KQRADGSWEGS   | WGVCFITYGTWFG    | LEAFACMGHT    | YQDGA      | ACAEVAQ      | ACNFLLSQ    | QADGGW    | GEDFESCEE |           |   |
| ScLAS  | : | LGLTYFHKYF  | -DYRKEEIRTR   | IRIAIEFIKKS | QLPDGSWYGNW   | GVCFITYGTWFG     | LEAFACMGHT    | YQDGA      | ACAEVAQ      | ACNFLLSQ    | QADGGW    | GEDFESCEE |           |   |
| SHC    | : | ECFGSE      | -----GY--     | DDAWKVI     | RRAVEYLLKRE   | QKPDGSWEGS       | WGVCFITYGTWFG | LEAFACMGHT | YQDGA        | ACAEVAQ     | ACNFLLSQ  | QADGGW    | GEDFESCEE |   |
|        |   | 1           | F             | p           | e             | 6                | a             | 5          | Q            | DGSW        | 6         | G         | GGWgEs    | S |

Erg 7 W587

EtAS F728, M729

EtAS L734

EtAS Y736

|        |   |         |            |                |             |              |             |              |           |           |         |          |         |                   |    |    |    |     |   |
|--------|---|---------|------------|----------------|-------------|--------------|-------------|--------------|-----------|-----------|---------|----------|---------|-------------------|----|----|----|-----|---|
|        |   | *       | 720        | *              | 740         | 760          | 800         |              |           |           |         |          |         |                   |    |    |    |     |   |
| EtAS   | : | KKYVPLE | EDNRSNLVHT | SWALMGLI       | SAGQMDR     | PTPLHRAAKLL  | LINSQLEDGDF | PQCEITGV     | EMRNCMLHY | AAYRN     | IYPLWAL | ABYRNRV  | PLPSTTL | ---               |    |    |    |     |   |
| PNY1   | : | KVYVPLE | EGNRSNLVHT | GWALMGLI       | HSEQAER     | PTPLHRAAKLL  | LINSQMEDGDF | PQCEITGV     | EMRNCMLHY | AAYRN     | IYPLWAL | ABYRRRV  | PLPSLGT | ---               |    |    |    |     |   |
| BPY    | : | KEYVPLE | EGNKSNLVHT | AWAMMGLI       | HAGQAER     | PTPLHRAAKLL  | LINSQLEDGDF | PQCEITGV     | EMRNCMLHY | AAYRN     | IYPLWAL | ABYRKHV  | PLP-LG  | KNLN              |    |    |    |     |   |
| PSY    | : | KIYVPLE | EGNRSNLVHT | AWAMMGLI       | HAGQAER     | PTPLHRAAKLL  | LINSQLEQGDW | PQCEITGV     | EMRNCMLHY | PMYRDI    | YPLWAL  | ABYRRRV  | PLP-    | -----             |    |    |    |     |   |
| AtLUP1 | : | QRYIP   | SEGERSNLV  | QTSWAMMALI     | HGTQAER     | DLIPLHRAAKLL | LINSQLENGDF | PQCEITGA     | EMRNCMLHY | ATYRN     | TFPLWAL | ABYRKVV  | FEI     | -----             |    |    |    |     |   |
| TRW    | : | KVYTN   | LEGNRSNLV  | HTSWALL        | SLIKAGQAE   | IDPTPI       | SNGVRL      | LINSQMBEGDF  | PQCEITGV  | EMRNCMLHY | SSERN   | IFPIWAL  | GEYRRIV | -----             |    |    |    |     |   |
| OEW    | : | KVYTN   | LEGNRSNLV  | QTSWALL        | SLIKAGQVE   | IDPGPI       | IHRGIR      | LLVNSQMEDGDF | PQCEITGA  | EMRNCMLHY | SSYRN   | IFPIWAL  | GEYRRRI | -----             |    |    |    |     |   |
| BPW    | : | KVYTN   | LEGNRANLV  | QTSWALL        | SLIDARQAE   | IDPTPI       | IHRGVR      | VLLNSQMEDGDF | PQCEITGV  | EMRNCMLHY | SSYRN   | IFPIWAL  | GEYRRRV | -----             |    |    |    |     |   |
| AtCAS1 | : | KVYSN   | LDGNRSHV   | NTAWAMLALI     | GAGQAEV     | DRKPLHRAA    | RYLINAQ     | MENGDF       | PQCEITGV  | EMRNCMLHY | AAYRN   | IFPIWAL  | GEYRCQV | -----             |    |    |    |     |   |
| PcCAS  | : | KVYSN   | LEGNRSHV   | NTAWAMLALI     | EAEQAKR     | PTPLHRAA     | VCLINSQ     | LENGDF       | PQCEITGV  | EMRNCMLHY | AAYRC   | IFPIWAL  | GEYR-RV | -----             |    |    |    |     |   |
| PgCAS  | : | KVYTN   | LEGNRSHV   | NTAWAMLALI     | DAGQAER     | DATPLHRAA    | KLINSQ      | MENGDF       | PQCEITGV  | EMRNCMLHY | AAYRN   | IFPIWAL  | GEYRCRV | -----             |    |    |    |     |   |
| BpCAS1 | : | KVYTN   | LKDNRP     | PHIVNTAWAMLALI | DAGQAER     | PTPLHRAA     | RIILINSQ    | MENGDF       | PQCEITGV  | EMRNCMLHY | AAYRN   | IFPIWAL  | GEYRCRV | -----             |    |    |    |     |   |
| AtLAS1 | : | KVYTN   | LPGNKSHI   | VNTSWALLALI    | EAGQASR     | DPMLHRAA     | KSLLINSQ    | MEDGDY       | PQCEITGV  | EMRNCMLHY | AAYRN   | IFPIWAL  | GEYRKLM | -----             |    |    |    |     |   |
| HsLAS  | : | RRY--   | LQSAQS     | QHNTCWAMMGL    | MAVRHP--    | DI           | EAQER       | GVRCLLEK     | QLENGDW   | PQENIAGV  | ENKSCA  | ISYTSYRN | IFPIWAL | GRFSQLYPERALAGHP- |    |    |    |     |   |
| MmLAS  | : | RRY--   | VQSARS     | QVHSTCWALMGL   | MAVRHP--    | DI           | TAQER       | GIRCLLGK     | QLENGDW   | PQENISGV  | ENKSCA  | ISYTSYRN | IFPIWAL | GRFSNLYPDNTLAGHI- |    |    |    |     |   |
| ScLAS  | : | HSY--   | VDSEKSL    | VVQTAWALLALI   | FAEYPNKEV-- | IDR          | GIDLLK      | NRQEE        | SGEWKFE   | SVVEGV    | ENHSCA  | ISYPSYR  | ELFKAL  | GMYSRAYETHTL      |    |    |    |     |   |
| SHC    | : | PAYAGK  | GASTPS--   | QAWAMMALI      | AGGRAE      | SEAA--       | RRG         | VQYLVET      | QRPDGGW   | DEPYTY    | GTGPE   | DFYLSY   | MYRHV   | FTLALGRYKQAI      |    |    |    |     |   |
|        |   | 5       | s          | v              | T           | WA66         | L6          | d            | r         | 6         | n       | Q        | e       | Gd5p              | Gv | 54 | 5P | wAL | 5 |

Erg 7 L705

Erg 7 F699, N700

Erg 7 Y707

```

          *
EtAS      : ----- : -
PNY1     : ----- : -
BPY      : QVVNCIGQSPLYKKYK : 779
PSY      : ----- : -
AtLUP1   : -----VN : 757
TRW      : -----QNI-- : 758
OEW      : -----LHAQT : 758
BPW      : -----LFA-- : 755
AtCAS1   : -----LLQQGE : 759
PsCAS    : -----L--QAC : 756
PgCAS    : -----L-QGPS : 758
BpCAS1   : -----L--KAL : 767
AtLAS1   : -----L---SL : 756
HsLAS    : ----- : -
MmLAS    : ----- : -
ScLAS    : ----- : -
SHC      : -----ERR : 631

```

The triterpene cyclases amino acids sequences were aligned using Clustal W, as implemented in the (CLC Sequence Viewer (CLC bio), and the figure was made by GenDoc (<http://www.nrbsc.org/gfx/genedoc/>). EtAS: *Euphorbia tirucalli*  $\beta$ -amyirin synthase (AB206469), PNY1: *Panax ginseng*  $\beta$ -amyirin synthase (AB009030), BPY: *Betula platyphylla*  $\beta$ -amyirin synthase (AB055512), PSY: *Pisum sativum*  $\beta$ -amyirin synthase (AB034802), AtLUP1: *Arabidopsis thaliana* multifunctional triterpene cyclase (At1g78970), TRW: *Taraxacum officinale* lupeol synthase (AB025345), OEW: *Olea europaea* lupeol synthase (AB025343), BPW: *Betula platyphylla* lupeol synthase (AB055511), AtCAS1: *Arabidopsis thaliana* cycloartenol synthase (At2g07050), PsCAS: *Pisum sativum* cycloartenol synthase (D89619), PgCAS: *Panax ginseng* cycloartenol synthase (AB009029), BpCAS1: *Betula platyphylla* cycloartenol synthase (AB055509), AtLAS1: *Arabidopsis thaliana* lanosterol synthase (At3g45130), HsLAS: *Homo sapiens* lanosterol synthase (P48449), MmLAS: *Mus musculus* lanosterol synthase (AK044016), ScLAS: *Saccharomyces cerevisiae* lanosterol synthase (P38604), SHC: *Alicyclobacillus acidocaldarius* squalene-hopene cyclase

**Table S1.** Functions of the active site residues. The locations of each of the residues in the reaction cavity are also shown in Scheme 2 and Fig. 1.

| EtAS               |                     |                                                                        |                                                                                                                                               | <i>S. cerevisiae</i> LaS (Erg7)                   |                     |                                                                                                                                                        |                                                                                                                                                                                                                   |
|--------------------|---------------------|------------------------------------------------------------------------|-----------------------------------------------------------------------------------------------------------------------------------------------|---------------------------------------------------|---------------------|--------------------------------------------------------------------------------------------------------------------------------------------------------|-------------------------------------------------------------------------------------------------------------------------------------------------------------------------------------------------------------------|
| Catalytic Sites    | Constructed Mutants | Product Profile (see Fig. 2) and Site Locations                        | Functions                                                                                                                                     | Sites Equivalent to EtAS (see Fig. S1 in the ESI) | Constructed Mutants | Product Profile                                                                                                                                        | Functions                                                                                                                                                                                                         |
| W257 <sup>23</sup> | A, V, L, F, Y       | Pentacyclic lupeol <b>26</b> as major product. Located at E-ring site. | Cation- $\pi$ complex with oleanyl cation <b>9</b> and CH- $\pi$ complex with Me-30 of substrate, which is quite different from W232 in Erg7. | W232 <sup>29</sup>                                | W232X               | Protosta-12,24-dien-3 $\beta$ -ol ( <b>I</b> ), lanosterol ( <b>II</b> ), parkeol ( <b>III</b> ).                                                      | Discussed based on the $\pi$ -electron and the steric effect on the H234:Y510-hydrogen bond network. Located in proximate to H234, thus mutations at this position impair the H234:Y510 catalytic dyad structure. |
| Y259 <sup>23</sup> | A, V, I, L, H, F, W | Tetracycle <b>18</b> as major products. Located at D-ring site.        | Cation- $\pi$ complex with baccharenyl cation <b>7</b> .                                                                                      | H234 <sup>30-32, 34</sup>                         | H234X               | Achilleol A ( <b>11</b> ), tricycle (13 $\alpha$ H)-isomalabarica-14(26), 17 <i>E</i> , 21-trien-3 $\beta$ -ol ( <b>IV</b> ), <b>I</b> and <b>II</b> . | Located at C/D-ring site. Hydrogen bonding with Y510. Responsible for the formation of H234:Y510 catalytic dyad structure.                                                                                        |
| F413 <sup>23</sup> | A, V, M, S, T, Y, W | Tetracycle <b>18</b> as major products. Located at D-ring site.        | Appropriate steric bulk, not $\pi$ -electron.                                                                                                 | T384 <sup>36, 38</sup>                            | T384Y               | Tetracycles with double bonds different from lanosterol (e.g., <b>III</b> ,                                                                            | Discussed by combination with V454 and Q450, <sup>38</sup> but the function is not clearly assigned. Located at D-ring site.                                                                                      |

|                    |                              |                                                                                                                                                        |                                                                                   |                       |       |                                                                                                                                                                                                     |                                                                                                                                                                                                                                                                                                                                                                                       |
|--------------------|------------------------------|--------------------------------------------------------------------------------------------------------------------------------------------------------|-----------------------------------------------------------------------------------|-----------------------|-------|-----------------------------------------------------------------------------------------------------------------------------------------------------------------------------------------------------|---------------------------------------------------------------------------------------------------------------------------------------------------------------------------------------------------------------------------------------------------------------------------------------------------------------------------------------------------------------------------------------|
|                    |                              |                                                                                                                                                        |                                                                                   |                       |       | 9 $\beta$ -lanosta-7,24-dien-3 $\beta$ -ol <b>V</b> , and <b>II</b> .                                                                                                                               |                                                                                                                                                                                                                                                                                                                                                                                       |
| F474 <sup>21</sup> | G, A, V, L, M,<br>T, H, Y, W | Bicyclic products <b>12–16</b> were produced from the Gly and Ala mutants by chair-boat and chair-chair folding conformations. Located at B-ring site. | Steric bulk, not $\pi$ -electron, significantly differing from Erg7 F445 residue. | F445 <sup>39</sup>    | F445X | <b>II, III, IV</b> and <b>V</b>                                                                                                                                                                     | Importance of $\pi$ -electron density was proposed (perhaps cation- $\pi$ interaction), differing from the functional analysis of the EtAS F474, but the function is not clearly specified. Interacts with Tyr99, Trp390, Tyr510, Tyr707 and Tyr710 residues to form a $\pi$ -electron-rich pocket. The function of the F445Y mutant has not been reported. Located at A/B-ring site. |
| V483 <sup>26</sup> | G, A, S, I, F                | Monocycles <b>10</b> and <b>11</b> from Gly and Ala mutants, but $\beta$ -amyrin <b>2</b> from the Ile variant. Located at A-ring site.                | Steric bulk.                                                                      | V454 <sup>35-37</sup> | G, A  | Camelliol C ( <b>10</b> ) and <b>11</b> from Gly and Ala mutants, but lanosterol <b>II</b> from Leu and Ile mutants. Camelliol C synthase: <sup>37</sup> which is replaced by Ala at this position. | Steric bulk, the same function as in EtAS. Initiation (A-ring) site.                                                                                                                                                                                                                                                                                                                  |



|                    |                        |                                                                                                                |                                                                                                                                                                   |                                                                     |                     |                                                                                                                                                                                                              |                                                                                                                                                                                                                                      |
|--------------------|------------------------|----------------------------------------------------------------------------------------------------------------|-------------------------------------------------------------------------------------------------------------------------------------------------------------------|---------------------------------------------------------------------|---------------------|--------------------------------------------------------------------------------------------------------------------------------------------------------------------------------------------------------------|--------------------------------------------------------------------------------------------------------------------------------------------------------------------------------------------------------------------------------------|
| D485 <sup>12</sup> | N, E                   | No enzymatic products generated. Initiation site for the cyclization reaction. D485C486TA motif.               | Proton attack at epoxide ring.                                                                                                                                    | D456 <sup>18a, b</sup><br><br>(human lanosterol D455 <sup>9</sup> ) | N                   | —<br><br>(not reported)                                                                                                                                                                                      | Presumed based on human lanosterol X-ray analysis but no mutation analysis. Proton attack on the epoxide ring, initiation site for the cyclization reaction, D455C456TA motif.                                                       |
| C486 <sup>12</sup> | A                      | Decreased activity by ~50%.<br><br>Initiation site for the cyclization reaction.                               | Increases the acidity of D485.                                                                                                                                    | C457 <sup>34</sup><br><br>(human lanosterol C456 <sup>9</sup> )     | C457G <sup>34</sup> | <b>11</b>                                                                                                                                                                                                    | Presumed based on human lanosterol X-ray analysis. Increases the acidity of D455. <sup>9</sup>                                                                                                                                       |
| W534 <sup>26</sup> | A, V, I, M, H,<br>F, Y | The activities of all the mutants decreased significantly.                                                     | Steric bulk keeps the substrate at the correct position in the reaction cavity; hydrogen bonding between Y259 and W534 is unlikely, unlike Erg7 (H232:Y510 dyad). | Y510 <sup>29-34</sup>                                               | Y510X               | Y510F: <sup>33</sup> <b>II</b> and tricyclic iso-malabarica-triere skeleton <b>IV</b> . Y510K and Y510W: <sup>31</sup> <b>10</b> and <b>11</b> . Y510A: <sup>31</sup> <b>11</b> , <b>II</b> and <b>III</b> . | Hydrogen bonding with H234. The Y510:H-234 complex plays a key role in constructing the active-site structure for lanosterol scaffold biosynthesis. Located at C8-C9 (sterol numbering). This residue possibly abstracts H-9 proton. |
| E563 <sup>26</sup> | D, Q, N, I             | Gln, Asn and Ile mutants gave negligible activity, while Asp mutant retained activity.<br><br>Initiation site. | Increases the acidity of D485.                                                                                                                                    | E539 (not reported)                                                 | —                   | —                                                                                                                                                                                                            | —                                                                                                                                                                                                                                    |
| C564 <sup>12</sup> | A                      | Negligible activity. Initiation site.                                                                          | Increases the acidity of D485.                                                                                                                                    | C540 (not reported)                                                 | —                   | —                                                                                                                                                                                                            | X-ray analysis: . <sup>9</sup> Increases the acidity of D455                                                                                                                                                                         |

|                    |                           |                                                                                                                                                                                             |                                                                                                      |                                      |                                        |                                                                                                                                                                                                                                                                                                   |                                                                                                                                                                    |
|--------------------|---------------------------|---------------------------------------------------------------------------------------------------------------------------------------------------------------------------------------------|------------------------------------------------------------------------------------------------------|--------------------------------------|----------------------------------------|---------------------------------------------------------------------------------------------------------------------------------------------------------------------------------------------------------------------------------------------------------------------------------------------------|--------------------------------------------------------------------------------------------------------------------------------------------------------------------|
|                    |                           |                                                                                                                                                                                             |                                                                                                      | C533 <sup>9</sup> (human lanosterol) |                                        |                                                                                                                                                                                                                                                                                                   |                                                                                                                                                                    |
| W612 <sup>26</sup> | A, V, I, M, H, F, Y       | Aliphatic variants showed negligible activity. Aromatic mutants had high activity. A small amount of <b>28</b> was confirmed by W612Y and W612F variants. Located at A- and/or B-ring site. | Cation- $\pi$ complex with monocyclic cation.                                                        | W587 <sup>34</sup>                   | W587Y, W587F                           | <b>I, III, IV</b> , protostra-13(17),24-dien-3 $\beta$ -ol<br><b>VI</b> .                                                                                                                                                                                                                         | Stabilization of monocyclic and/or bicyclic cations via cation- $\pi$ interaction (CH- $\pi$ and/or $\pi$ - $\pi$ stacking interactions among Y707, Y99 and F699). |
| F728 <sup>22</sup> | A, I, M, H, Y, W          | As major products, aliphatic mutants afforded tetracycle <b>21</b> , whereas the aromatic Tyr variant gave $\beta$ -amyryn <b>2</b> . Located at D/E-ring site.                             | Cation- $\pi$ interaction as the main function; the effect of steric size on cyclization is minimal. | F699 <sup>42-44</sup>                | F699X (X=T, S, Q, C, Y, L, I, N, H, M) | Tricycles <b>IV</b> and <b>VIII</b> produced from a chair-boat-chair conformation. Tricycle <b>VII</b> were generated from chair-chair-chair structure, <sup>43</sup> and tetracycles <b>VI</b> , <b>IX</b> and <b>X</b> from intermediates bearing 17 $\alpha$ H and 17 $\beta$ H. <sup>43</sup> | Phe699 is located near C-17 of D-ring, but the function of Phe699 was discussed based on the combination of the Tyr99, Tyr707 and His234 residues. <sup>43</sup>   |
| M729 <sup>26</sup> | G, A, V, L, F, W, H, N, Q | G, A mutants: <sup>43</sup> <b>28</b> (major); V, L, F variants: $\beta$ -amyryn <b>2</b> (major), E-ring site.                                                                             | Steric bulk keeps the substrate at the correct position in the reaction cavity.                      | N700 (not reported)                  | —                                      | —                                                                                                                                                                                                                                                                                                 | —                                                                                                                                                                  |

|                    |                           |                                                                                                                                                         |                                                                                                                                                                    |                    |       |                                                                                                       |                                                                                                                                                                                                    |
|--------------------|---------------------------|---------------------------------------------------------------------------------------------------------------------------------------------------------|--------------------------------------------------------------------------------------------------------------------------------------------------------------------|--------------------|-------|-------------------------------------------------------------------------------------------------------|----------------------------------------------------------------------------------------------------------------------------------------------------------------------------------------------------|
| L734 <sup>26</sup> | A, G, V, I, M,<br>F, V, W | Taraxerol <b>30</b> from Gly, Ala, Val mutants, in addition to $\beta$ -amyrin <b>2</b> . Located at D-ring site.                                       | Steric bulk keeps the substrate at the correct position in the reaction cavity. Possibly CH- $\pi$ interaction with Y736                                           | I705 <sup>44</sup> | I705X | The following products were generated: <b>II, IV, VII, VI, VIII, IX, X, XI, XII</b> and <b>XIII</b> , | The function of Ile705 was discussed based on the combination of Tyr99 and Tyr707 residues. Stabilization of the ring structures consisting of tricycle, and tetracycle. Located at C/D-ring site. |
| Y736 <sup>26</sup> | A, S, L, M, F,<br>W       | Phe variant produced only $\beta$ -amyrin <b>2</b> in high yield, but other mutants did not give aberrant cyclization products. Located at C-ring site. | Possibly CH- $\pi$ interaction with Y736. Phe mutant has high activity, possibly indicating that the effect of the OH group on polycyclization is not significant. | Y707 <sup>45</sup> | Y707X | <b>13, II, III</b> and <b>V</b> .                                                                     | OH group of the Tyr is proximal to the C-8/C-9 cation, stabilizing the C-8/C-9 cation of bicyclic and protosteryl C-8/C-9 cation. Located B-ring site.                                             |

—: not reported.

Structure of the enzymatic products (**I–XI** and **10, 11** and **13**) were produced by Erg 7 mutants are shown in the Figure S2.

**Figure S2.** Structures of enzymatic products **I–XI** and **10**, **11** and **13**, which were generated by Erg 7 mutants. These products were reported by the Wu and the Matsuda groups. Structures of compounds **10**, **11** and **13** are identical to those of Figure 2 in the Text, including the compound numbering.

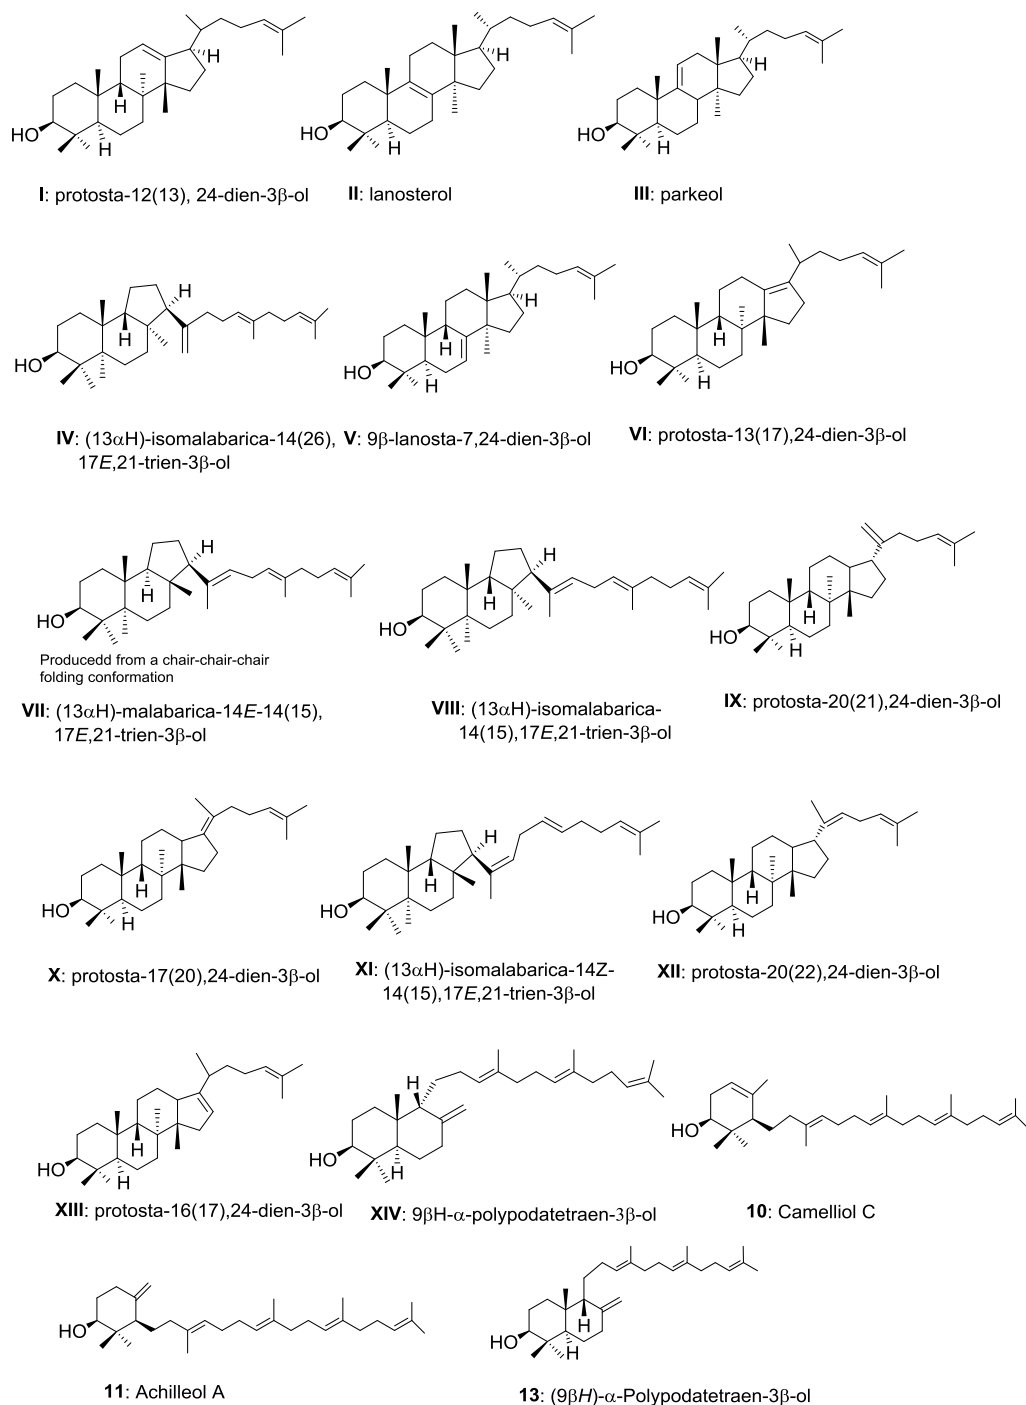

Supplement: c7ob00238f1.pdf [file c7ob00238f1.pdf]
